# Supplementary material for: HPV-driven heterogeneity in cervical cancer: study on the role of epithelial cells and myofibroblasts in the tumor progression based on single-cell RNA sequencing analysis
Source: PeerJ journal article supplement (doi:10.7717/peerj.18158), 2024-09-25

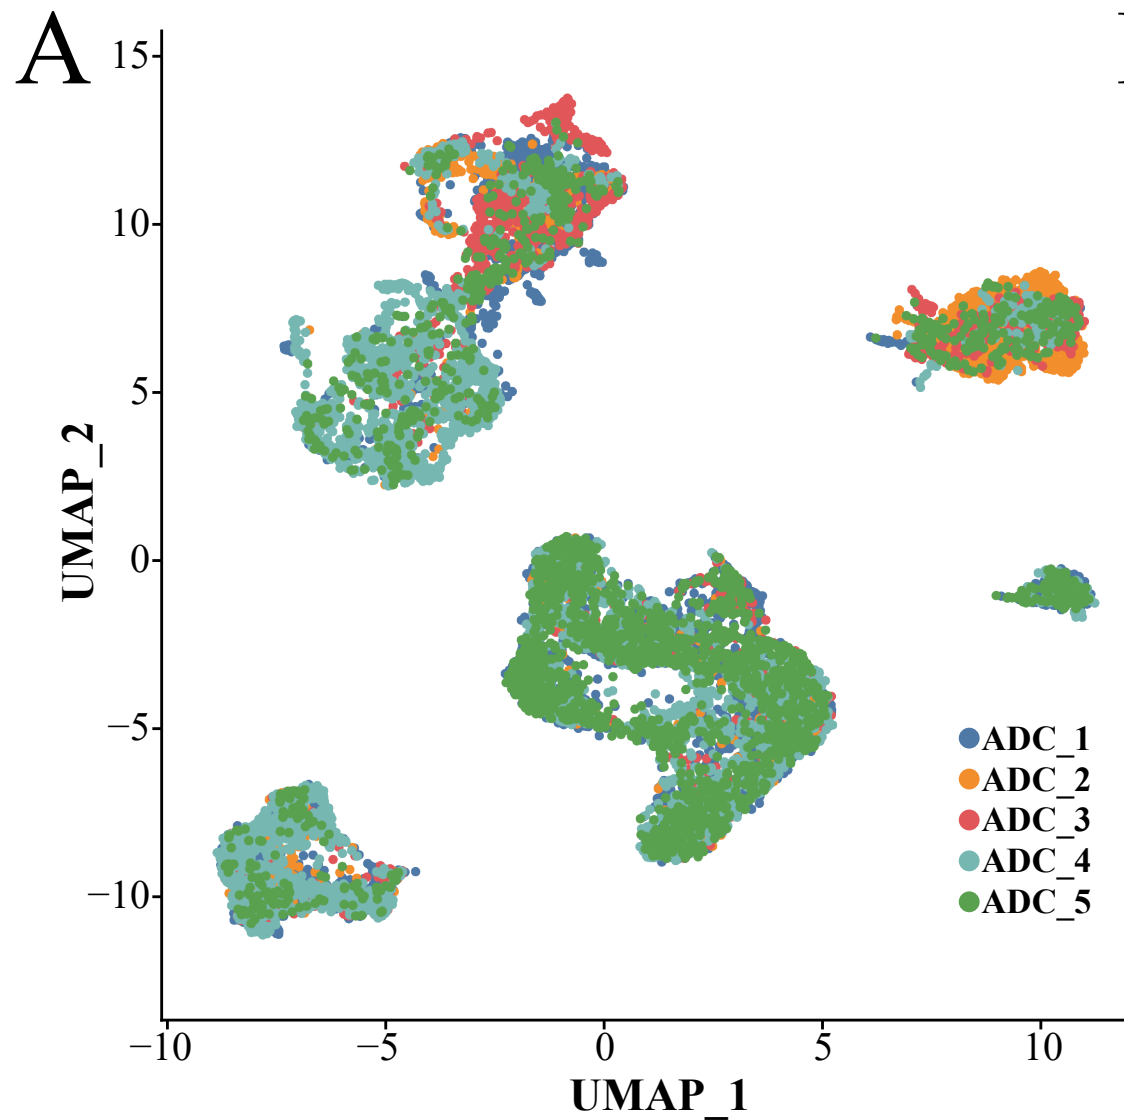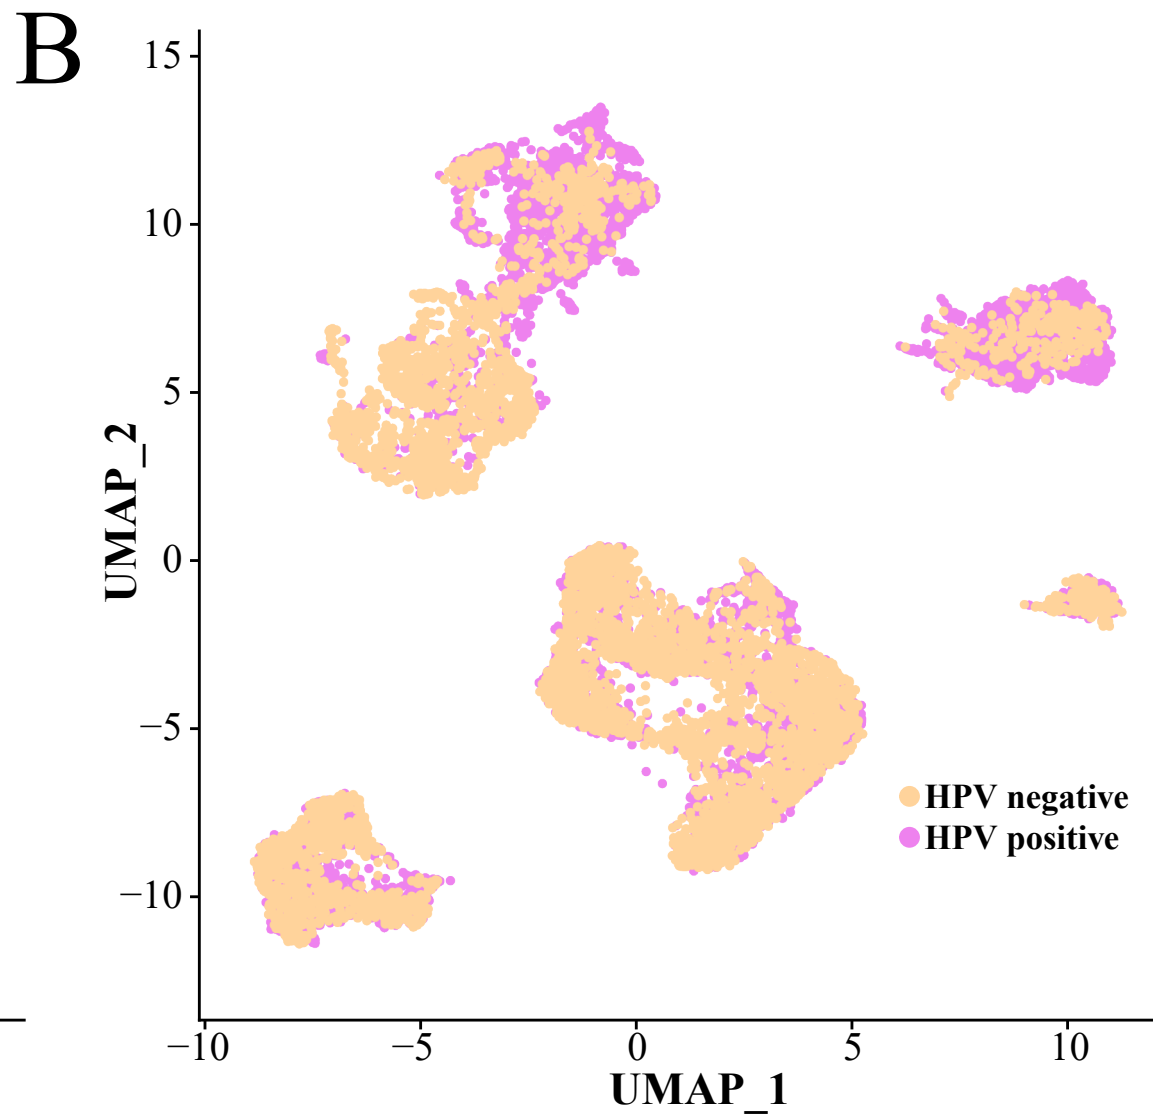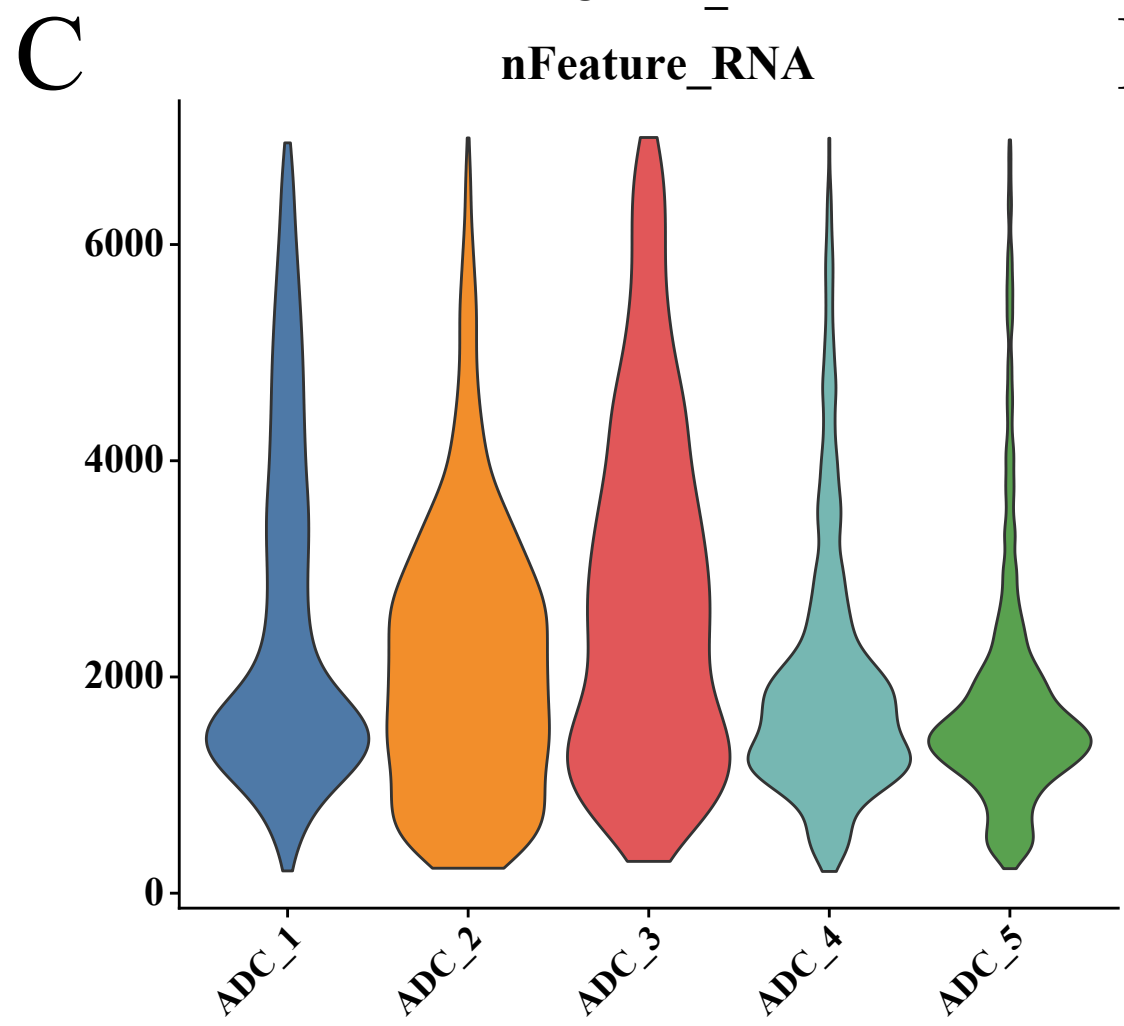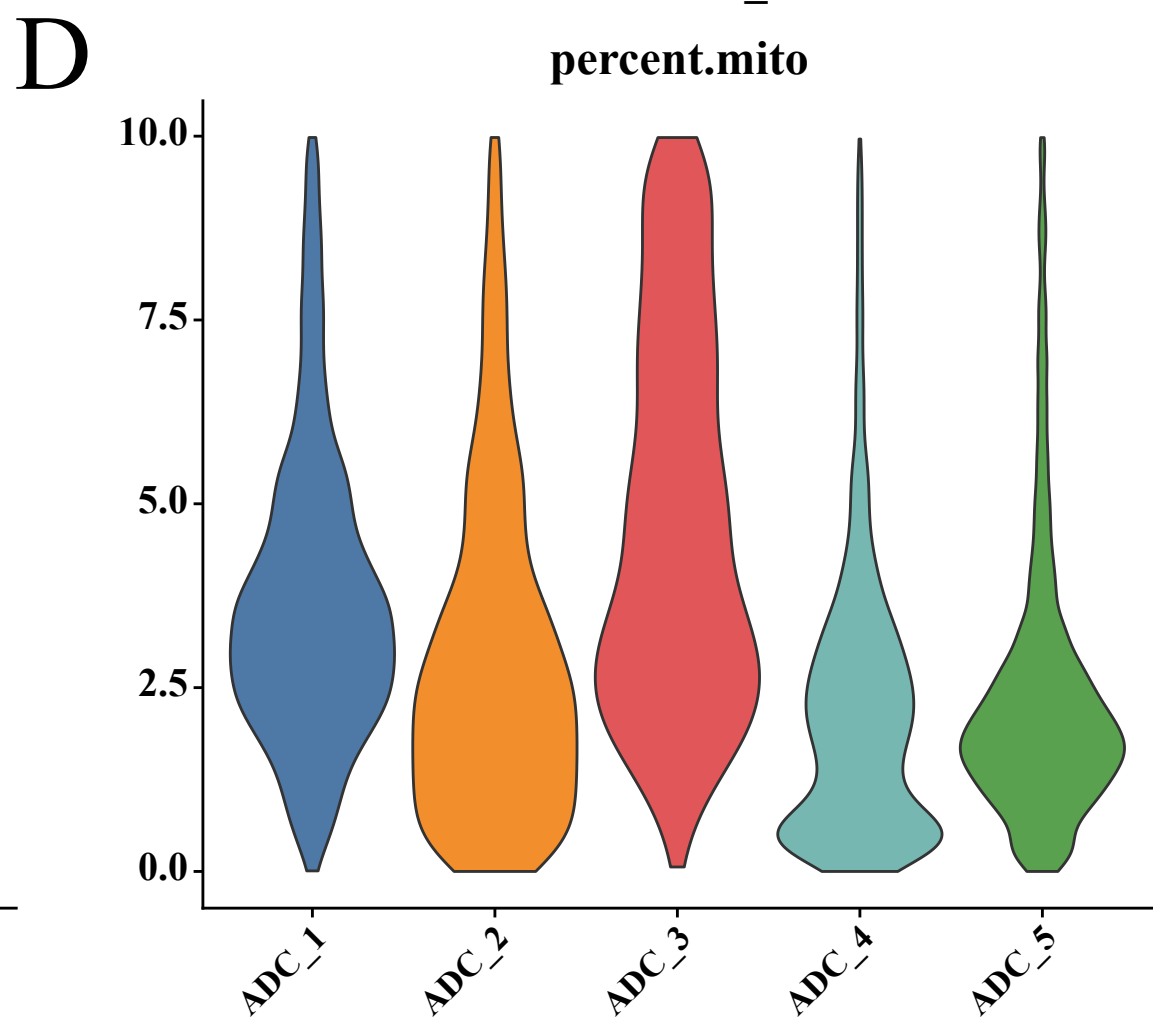

Supplement: Figure_S1.pdf [file Figure_S1.pdf]
